# Supplementary material
Source: publisher figshare collection journal article supplement (https://karger.figshare.com/ndownloader/files/30753133)
Supplement: Supplementary file 1 [file 30753133]

e-Table 1. Logistic regression for 30-day MACE.

|  | **Odds ratio (95% CI)** | **p-value** |
| --- | --- | --- |
| Polycythemia vs. normal | 0.92 (0.58-1.39) | 0.70 |
| Polycythemia vs. anemia* | 0.59 (0.36-0.92) | 0.03 |
| Age | 1.02 (1.02-1.03) | <0.001 |
| Male sex | 0.82 (0.7-0.96) | 0.02 |
| Hypertension | 0.84 (0.72-0.97) | 0.03 |
| Diabetes mellitus | 0.93 (0.8-1.07) | 0.29 |
| Smoking (current) | 0.80 (0.68-0.94) | 0.01 |
| STEMI presentation | 1.34 (1.16-1.54) | <0.001 |
| Family history of CAD | 0.88 (0.74-1.04) | 0.15 |
| Prior myocardial infarction | 1.28 (1.07-1.52) | 0.01 |
| Past PCI | 0.86 (0.71-1.03) | 0.11 |
| Peripheral vascular disease | 1.27 (1.01-1.59) | 0.04 |
| Prior CVA or TIA | 1.28 (1.01-1.58) | 0.04 |
| COPD | 1.28 (0.99-1.63) | 0.06 |
| Any malignancy | 1.19 (0.9-1.55) | 0.22 |

* Extracted from a separate sub group analysis.

ACS – acute coronary syndrome; CAD – coronary artery disease; CI – confidence interval; COPD – chronic obstructive pulmonary disease; CVA – cerebrovascular accident; PCI – percutaneous coronary intervention; STEMI – ST elevation myocardial infarction; TIA – transient ischemic attack.
